# Supplementary material for: Evaluation of Adhesive Characteristics of L. plantarum and L. reuteri Isolated from Weaned Piglets
Source: MDPI journal article supplement (doi:10.3390/microorganisms9081587), 2021-07-26
Supplement: s1 [file s1]

## Supplementary Materials

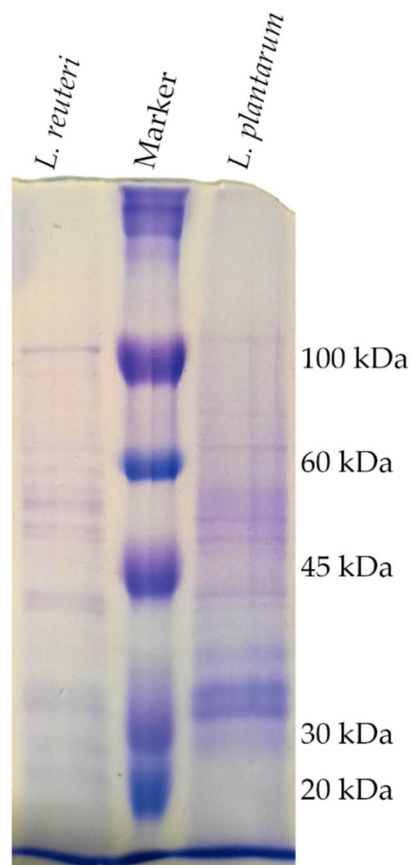

**Figure S1.** SDS-PAGE of surface proteins. Equal amount of volume (14 uL) of the extracted polypeptides were loaded to each well; from left to right: S-Layer extracted from *Lactobacillus reuteri*; Molecular weight marker (kDa), S-Layer extracted from *Lactobacillus plantarum*.
